# Supplementary material for: Tungsten oxide-coated copper oxide nanowire arrays for enhanced activity and durability with photoelectrochemical water splitting
Source: Royal Society of Chemistry journal article supplement (doi:10.1039/c3ta13912c), 2013-01-01
Supplement: c3ta13912c.pdf [file c3ta13912c.pdf]

## Supplementary Information

Alejandro Martínez-García<sup>a,b</sup>, Venkat Kalyan Vendra<sup>a,b</sup>, Swathi Sunkara<sup>a,b</sup>, Poonum Haldankar<sup>c</sup>, Jacek Jazinski<sup>b</sup>, and Mahendra K. Sunkara<sup>a,b</sup>

Phase pure  $\text{Cu}_2\text{O}$  was synthesized by annealing copper hydroxide nanowires in  $\text{N}_2$  for 4 hours the copper oxide. Figure S.I shows the structural, optical and photoelectrochemical characterization of electrodes comprising phase pure  $\text{Cu}_2\text{O}$  only.

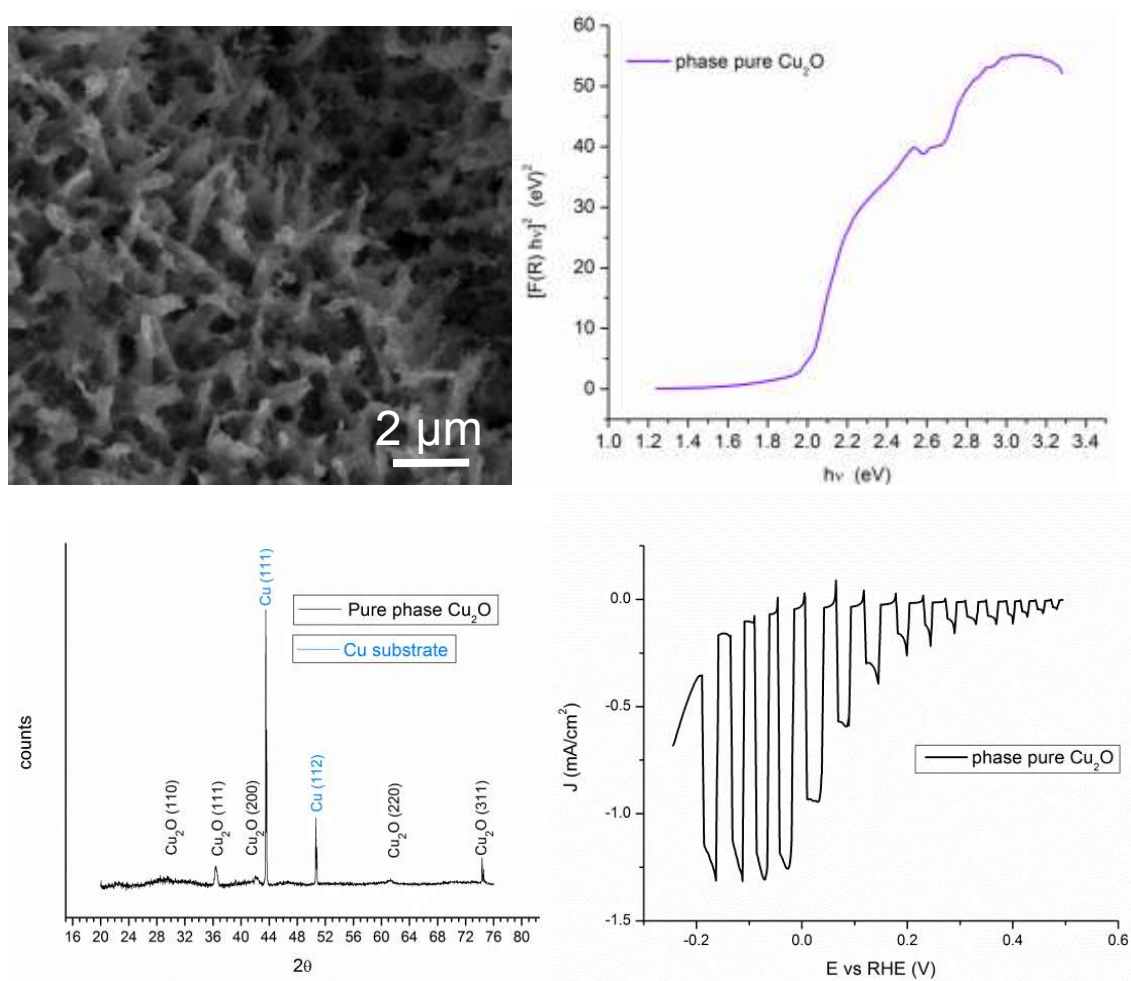

**Figure S.I.** Phase pure  $\text{Cu}_2\text{O}$  a) SEM (tilt 45°), b) Tauc Plot, c) XRD, d) Linear Sweep Voltammetry, at pH 5.

Figure S.II shows a transient open circuit voltage for two  $\text{Cu}_2\text{O}$  samples coated with  $\text{WO}_3$  (black) and  $\text{CuWO}_4$  (red) deposited by hot filament CVD. The open circuit potential under illumination becomes more positive, suggesting the electrode has a p-type conductivity.

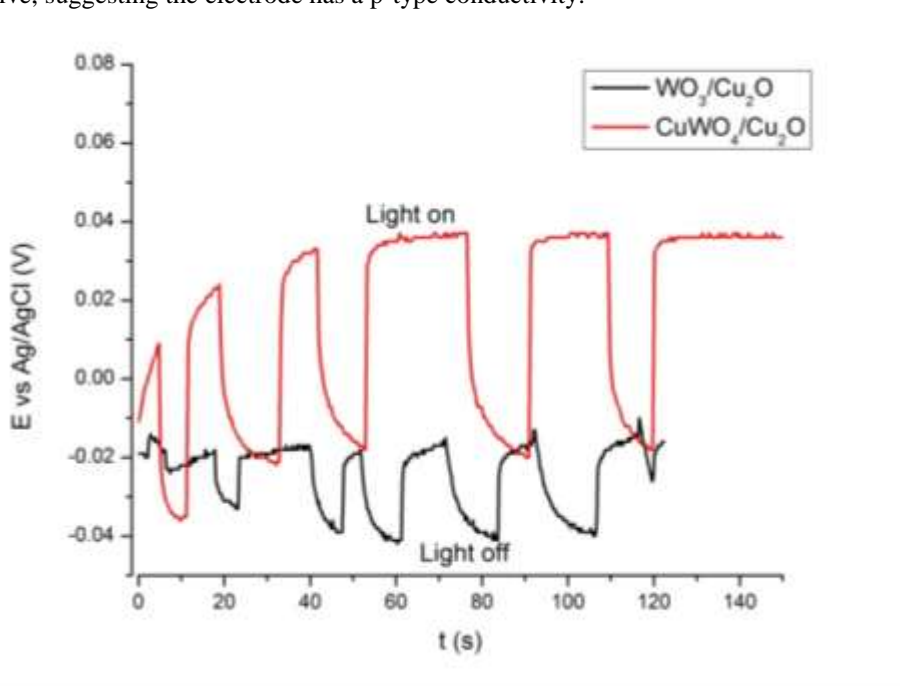

**Figure S.II.** Transient open-circuit voltage for the  $\text{CuWO}_4$ ,  $\text{WO}_3$  coated  $\text{Cu}_2\text{O}$  NWs.

Figure S.III shows the linear sweep voltammetry of  $\text{Cu}_2\text{O}/\text{WO}_3$  electrodes with different  $\text{WO}_3$  deposition times. At voltages near the onset potential, where band bending is low, spikes in photocurrent are observed under illumination. These spikes are less intense in the electrodes having thicker  $\text{WO}_3$  coatings. This can be understood by considering the extent of the depletion in  $\text{Cu}_2\text{O}$  for different  $\text{WO}_3$  thickness. If the thickness of the  $\text{WO}_3$  layer is less than the depletion region width in  $\text{WO}_3$ , then the space charge region in the p- $\text{Cu}_2\text{O}$  needs to become smaller in order to maintain the charge neutrality. By contrast, for a  $\text{WO}_3$  layer that exceeds the depletion region in the n-type  $\text{WO}_3$ , the space charge in p- $\text{Cu}_2\text{O}$  is larger than for the thin  $\text{WO}_3$  case. Therefore, the band bending for p- $\text{Cu}_2\text{O}$  is more intense for thicker tungsten oxide coatings. Consequently, the accumulation of electrons in  $\text{Cu}_2\text{O}$  coated with thick  $\text{WO}_3$  is not as prevalent and surface recombination is limited. The foregoing also accounts for improved stability in the thicker samples, since less excess electrons are accumulated in  $\text{Cu}_2\text{O}$  that could reduce the semiconductor to metallic copper.

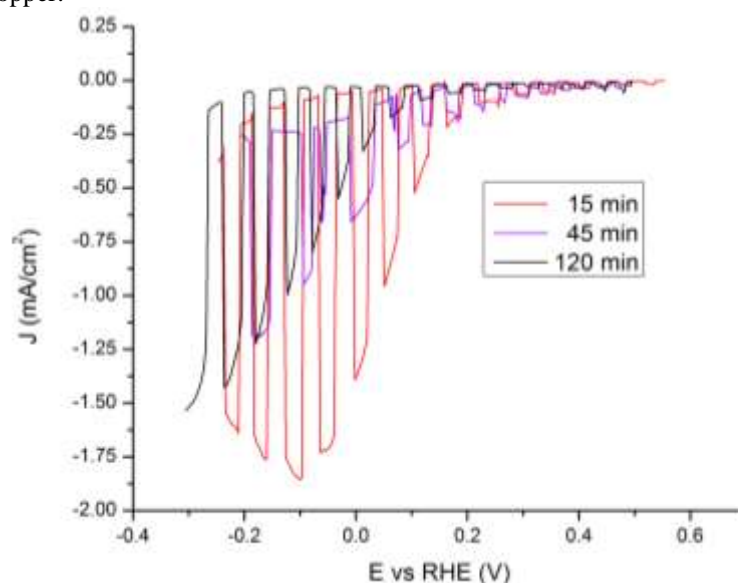

**Figure S.III.** Linear Sweep Voltammetry for  $\text{Cu}_2\text{O}/\text{WO}_3$ ; 15 min deposition of  $\text{WO}_3$  (red), 45 min deposition of  $\text{WO}_3$  (purple), 120 min deposition of  $\text{WO}_3$  (black).

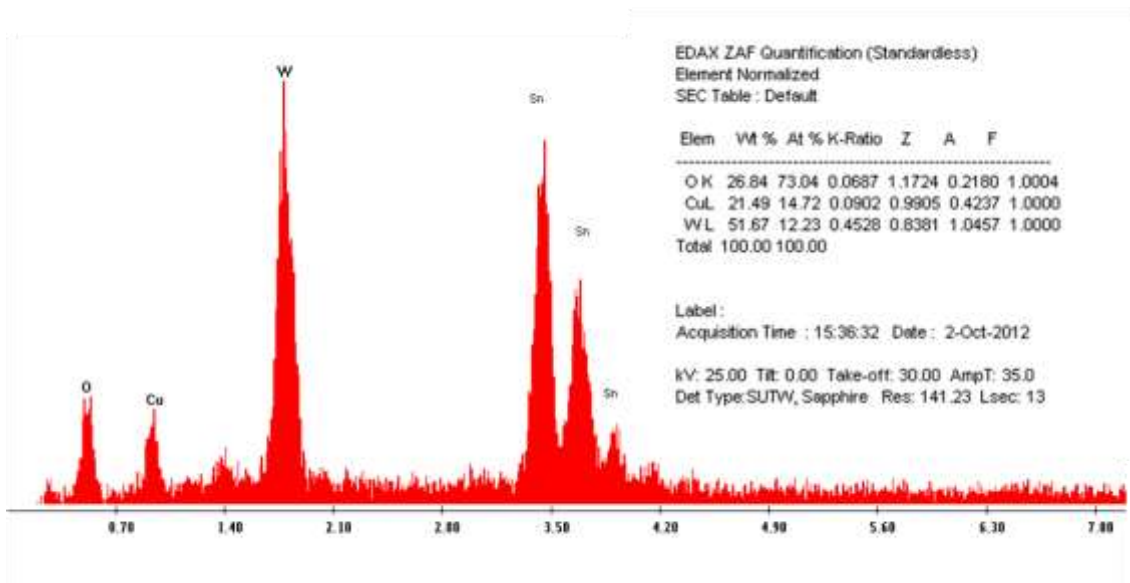

**Figure S. IV.** Energy Dispersive X-Ray Spectrum (EDS) of  $\text{CuWO}_4$  film on FTO. Inset: Elemental composition analysis of film showing a 1:1 atomic ratio of Cu to W. Sn peaks from underlying FTO.

The EDS data presented in figure S.IV was obtained from a film deposited by HFCVD with the copper-tungsten filament assembly on fluorinated tin oxide coated glass. The elemental quantification shows that the atomic ratio of Copper to Tungsten is around 1:1. This ratio is consistent with the stoichiometry of  $\text{CuWO}_4$ . The Sn signals result from the underlying tin oxide.

Figure S.Va shows a sketch of the HWCVD system used to deposit  $\text{WO}_3$  and  $\text{CuWO}_4$ . This image shows how the substrates were positioned underneath the metal source filament for deposition. The quartz tube is maintained at low pressure by a rotary vane vacuum pump and oxygen is fed through a gas distribution system depicted in the upper left hand side. Figure S.Vb shows the filament assembly in detail: a thicker tungsten filament is wrapped with a thinner copper wire as sources of these metals for the deposition of copper tungstate.

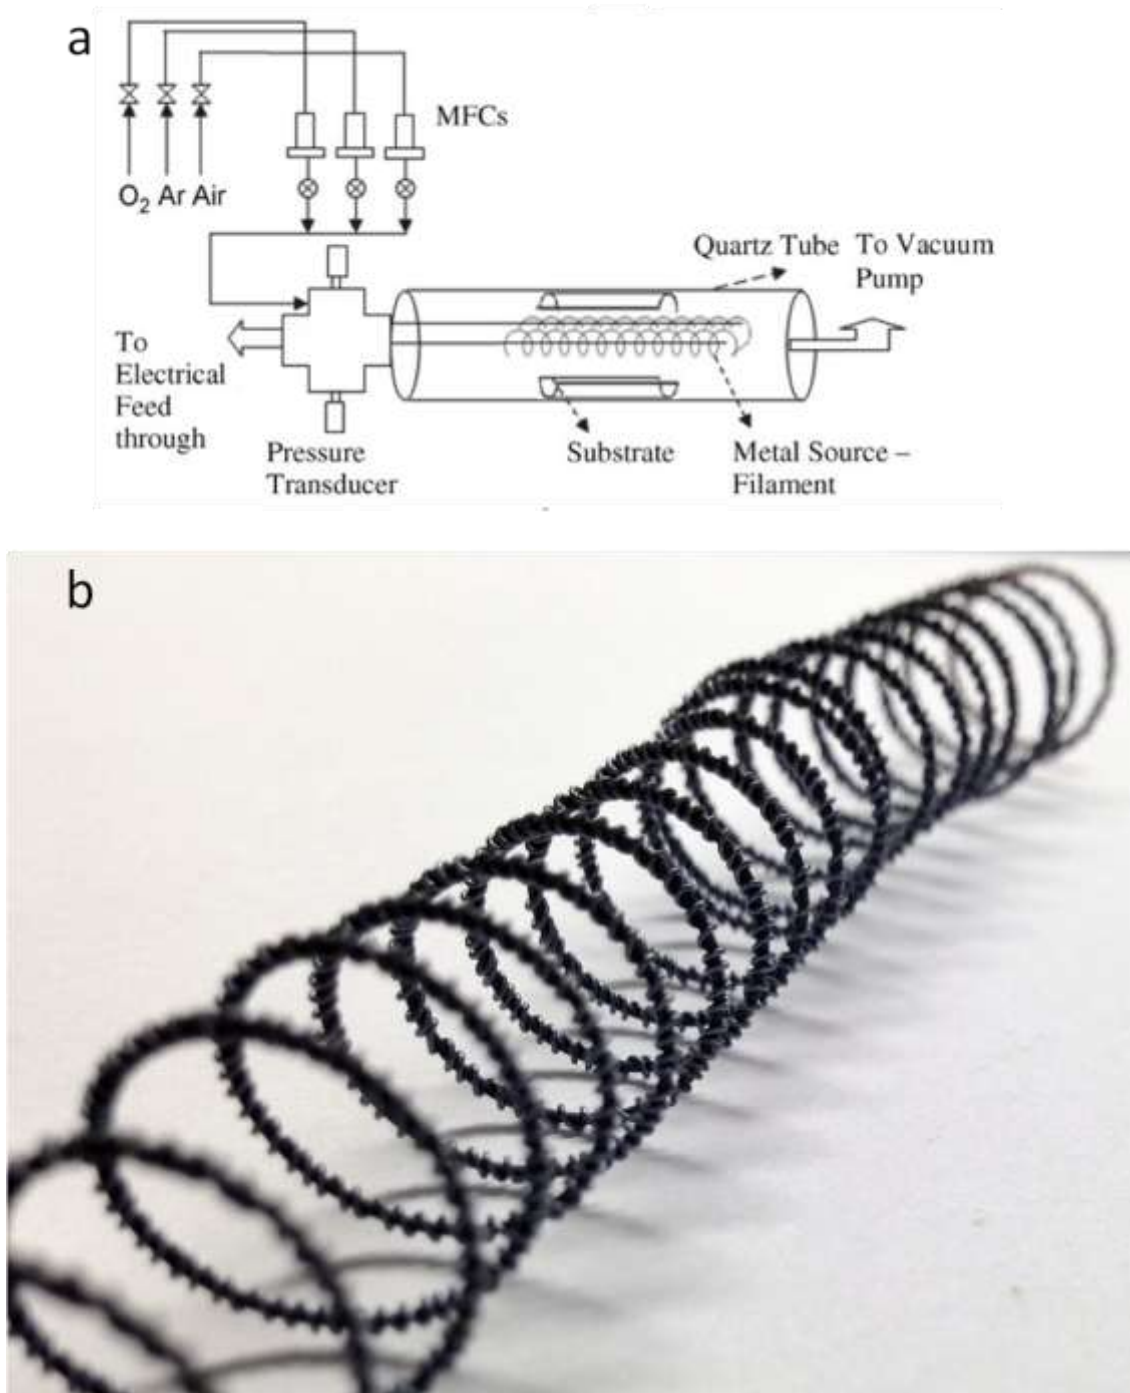

**Figure S. V** a) Sketch of HFCVD reactor used for deposition of  $\text{WO}_3$  or  $\text{CuWO}_4$ . b) macroscopic photograph of tungsten-copper filament assembly used for deposition of  $\text{CuWO}_4$ .

Figure S.VI presents a model for the deposition of  $\text{WO}_3$  and simultaneous reduction of  $\text{CuO}$  nanowires to  $\text{Cu}_2\text{O}$ . The volatile reducing agent is shown as it is transported from the hot tungsten filament after reaction with  $\text{O}_2$ . The nucleation of  $\text{WO}_2$  and uptake of oxygen from the wires is believed to be the mechanism by which a  $\text{WO}_3$  shell and  $\text{Cu}_2\text{O}$  core form simultaneously.

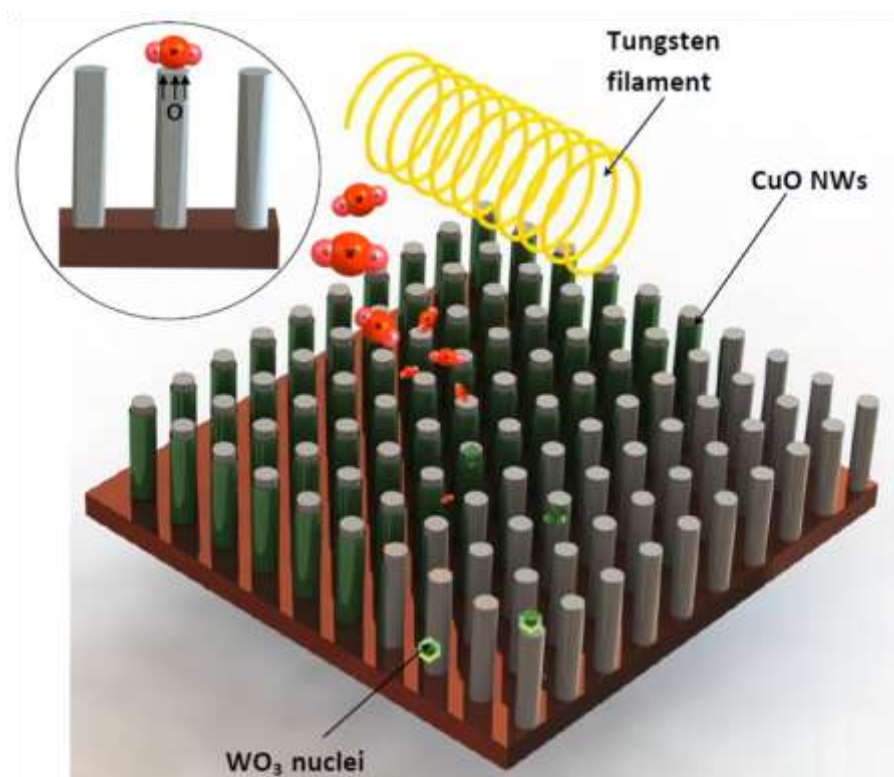

**Figure S. VI** a) Redox model for copper oxide phase transformation.
